# Supplementary material for: An apigenin-based bio-benzoxazine with three polymerizable functionalities: sustainable synthesis, thermal latent polymerization, and excellent thermal properties of its thermosets
Source: Royal Society of Chemistry journal article supplement (doi:10.1039/d0py00983k), 2020-01-01
Supplement: d0py00983k1.pdf [file d0py00983k1.pdf]

## *Supporting Information*

# An Apigenin-Based Bio-Benzoxazine with Three Polymerizable Functionalities: Sustainable Synthesis, Thermal Latent Polymerization, and Excellent Thermal Properties of Its Thermosets

*Boran Hao,<sup>[a]</sup> Lu Han,<sup>[b]</sup> Yuqi Liu,<sup>[a]</sup> and Kan Zhang<sup>\*[a]</sup>*

[a]Research School of Polymeric Materials, School of Materials Science and Engineering,  
Jiangsu University, 301 Xuefu Road, Zhenjiang, Jiangsu 212013, P. R. China

[b]Chemical Sciences Division, Physical Sciences Directorate, Oak Ridge National Laboratory,  
Oak Ridge, Tennessee 37831, United States.

\*: To whom correspondence should be addressed:

Kan Zhang: [zhangkan@ujs.edu.cn](mailto:zhangkan@ujs.edu.cn)

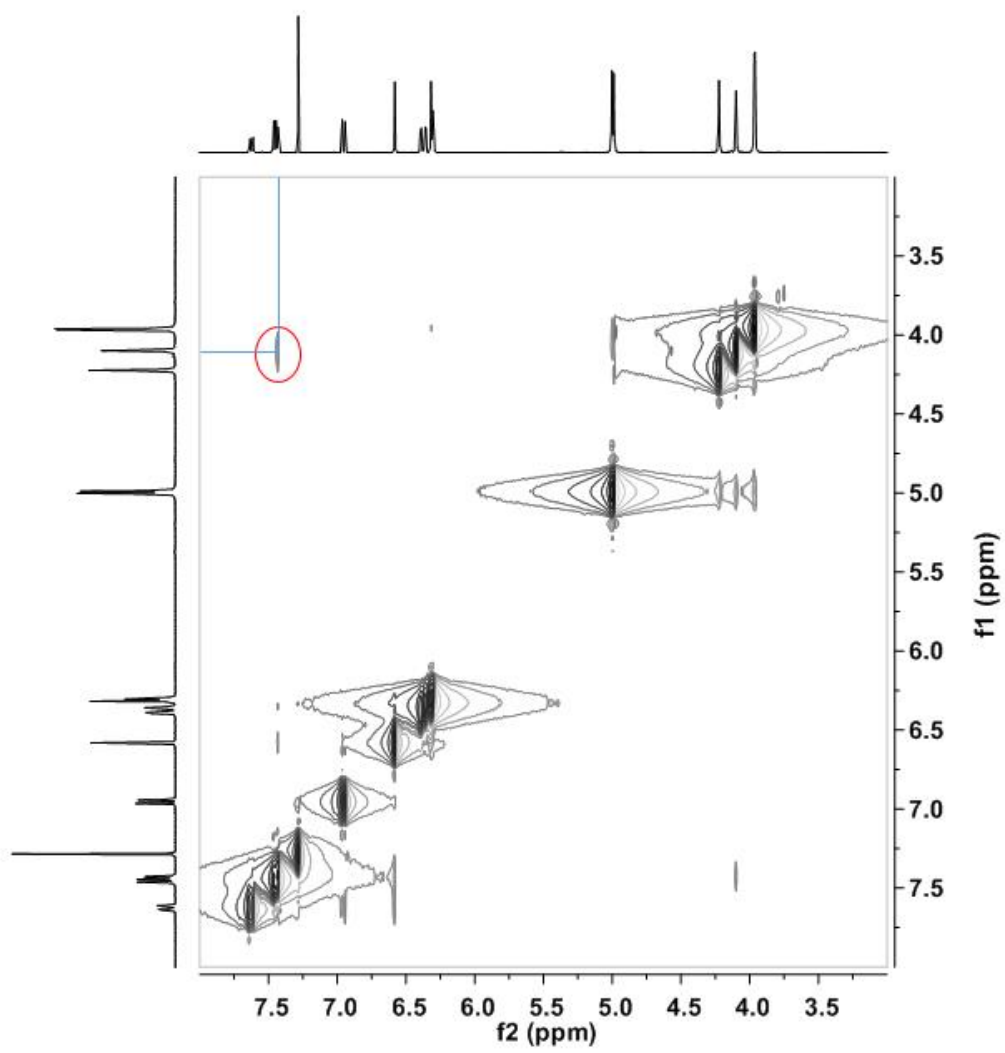

**Figure S1.** 2D  $^1\text{H}$ - $^1\text{H}$  NOESY NMR spectrum of API-fa.

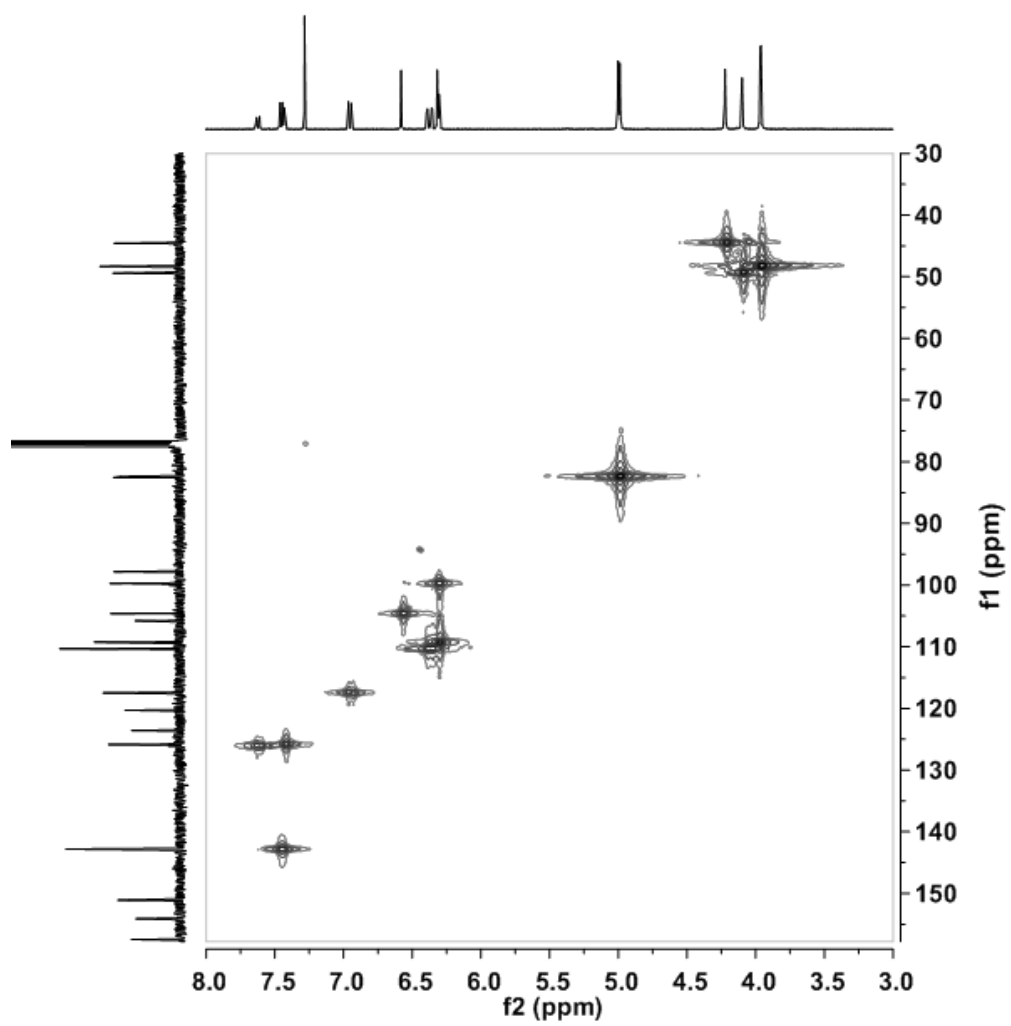

**Figure S2.** 2D  $^1\text{H}$ - $^{13}\text{C}$  HMQC NMR spectrum of API-fa.

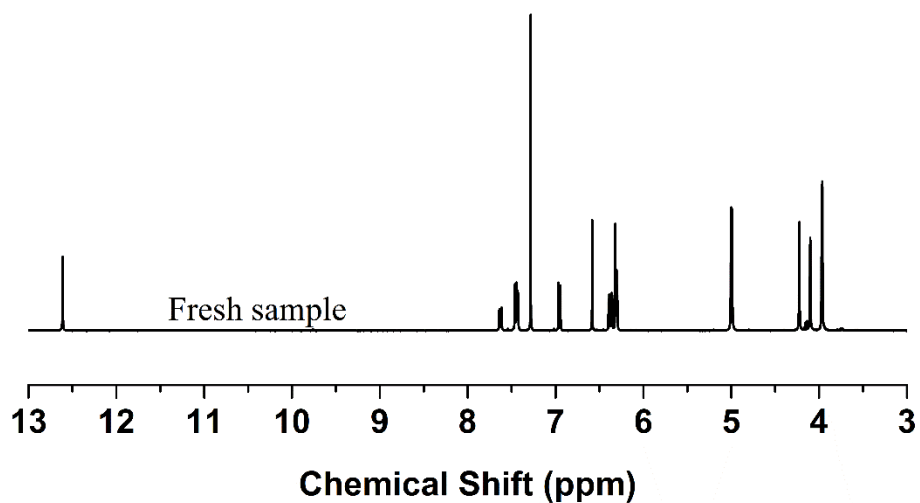

**Figure S3.**  $^1\text{H}$  NMR spectra of freshly prepared **API-fa** in  $\text{CDCl}_3$ .

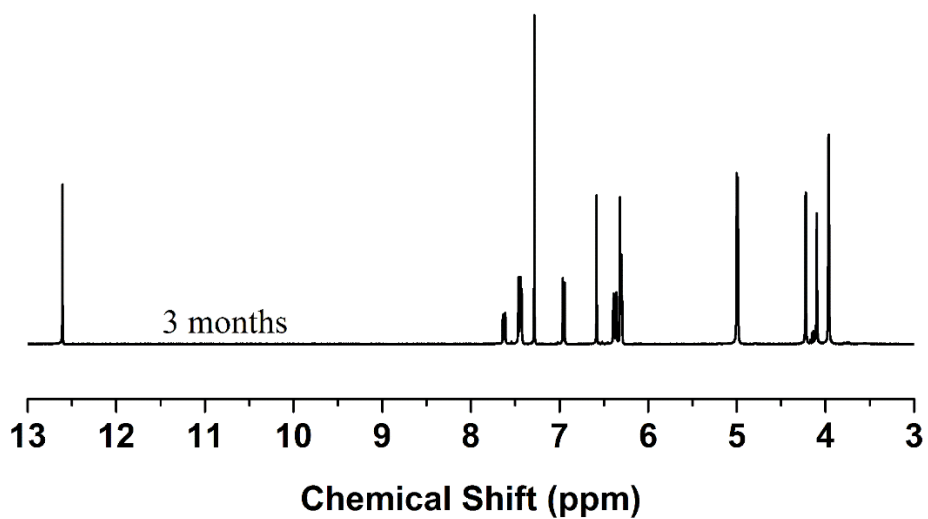

**Figure S4.**  $^1\text{H}$  NMR spectrum of **API-fa** in  $\text{CDCl}_3$  that recorded after storing in the dark for 3 months.

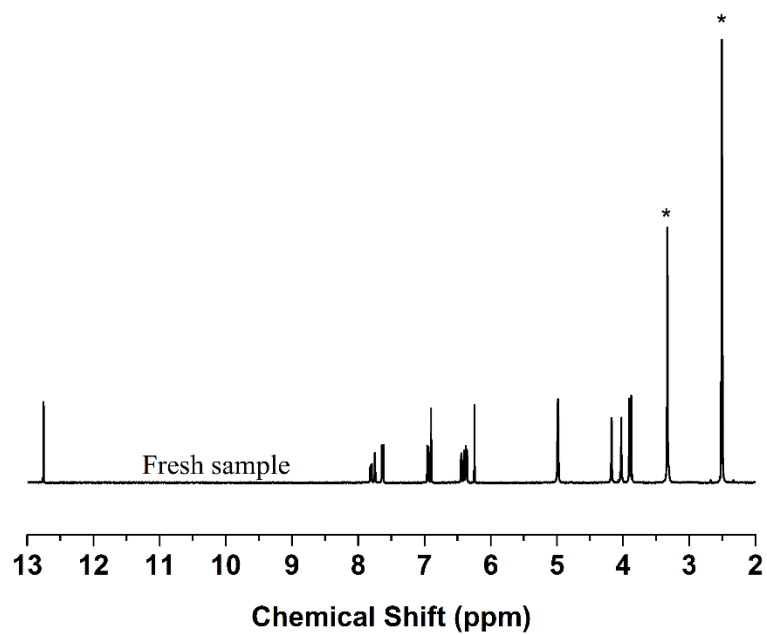

**Figure S5.** <sup>1</sup>H NMR spectra of freshly prepared **API-fa** in DMSO-*d*<sub>6</sub>.

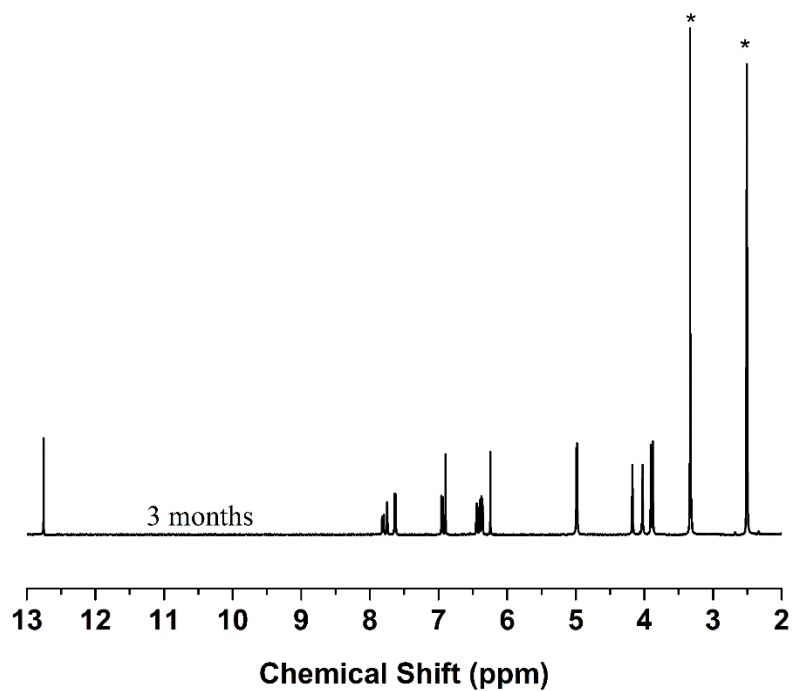

**Figure S6.** <sup>1</sup>H NMR spectrum of **API-fa** in DMSO-*d*<sub>6</sub> that recorded after storing in the dark for 3 months.

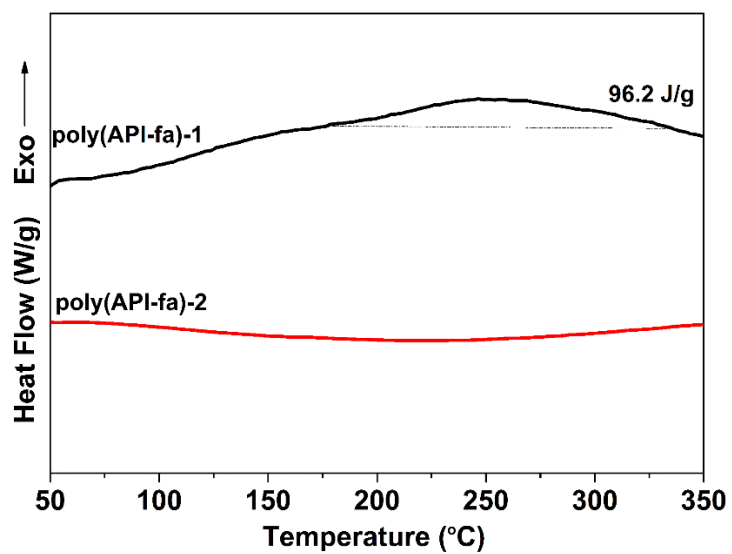

Figure S7. DSC thermograms of poly(API-fa)-1 and poly(API-fa)-2.
